# Supplementary material for: Evaluation of Unsolicited Feedback from Patients with Cancer and Their Families as a Strategy to Improve Cancer Care Delivery
Source: MDPI journal article supplement (doi:10.3390/curroncol31050186), 2024-04-28
Supplement: s1 [file s1]

## Supplemental Material

**Figure S1. The most common feedback categories adjusted for patients seen by year**

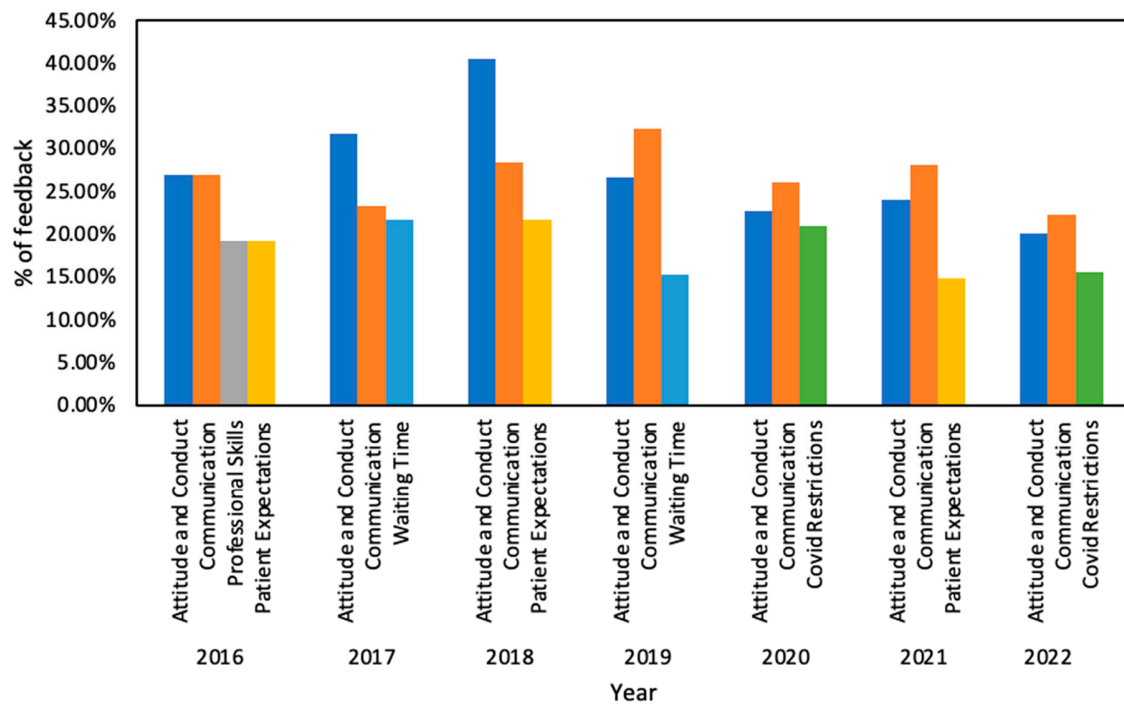

**Table S1 Characteristics of feedback related to waiting time.**

|                                         | <b>N</b> | <b>Total</b> | <b>Positive</b> | <b>Negative</b> | <b>N/A</b> |
|-----------------------------------------|----------|--------------|-----------------|-----------------|------------|
| <b>Waiting time;</b>                    | 74 (+1)  |              |                 |                 |            |
| Getting appointment:                    |          | 21 (28%)     | 0 (0%)          | 21 (100%)       | 0 (0%)     |
| Punctuality:                            |          | 8 (11%)      | 0 (0%)          | 8 (100%)        | 0 (0%)     |
| Radiology:                              |          | 2 (3%)       | 0 (0%)          | 2 (100%)        | 0 (0%)     |
| Biopsy to be done:                      |          | 1 (1%)       | 0 (0%)          | 1 (100%)        | 0 (0%)     |
| Other tests to be done:                 |          | 4 (5%)       | 0 (0%)          | 4 (100%)        | 0 (0%)     |
| Insurance/disability form:              |          | 2 (3%)       | 0 (0%)          | 2 (100%)        | 0 (0%)     |
| Drug reimbursement:                     |          | 7 (9%)       | 0 (0%)          | 7 (100%)        | 0 (0%)     |
| Prescription renewal:                   |          | 2 (3%)       | 0 (0%)          | 2 (100%)        | 0 (0%)     |
| Delay in treatment/Surgery:             |          | 21 (28%)     | 0 (0%)          | 21 (100%)       | 0 (0%)     |
| Delay in pathology report/test results: |          | 4 (5%)       | 0 (0%)          | 4 (100%)        | 0 (0%)     |
| N/A:                                    |          | 3 (4%)       | 0 (0%)          | 3 (100%)        | 0 (0%)     |

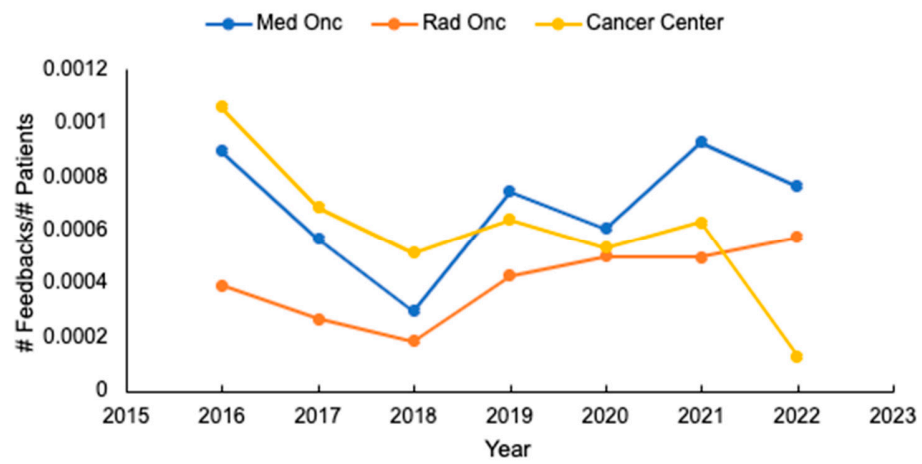

**Figure S2. Proportion of feedback per division adjusted for patients seen by year**

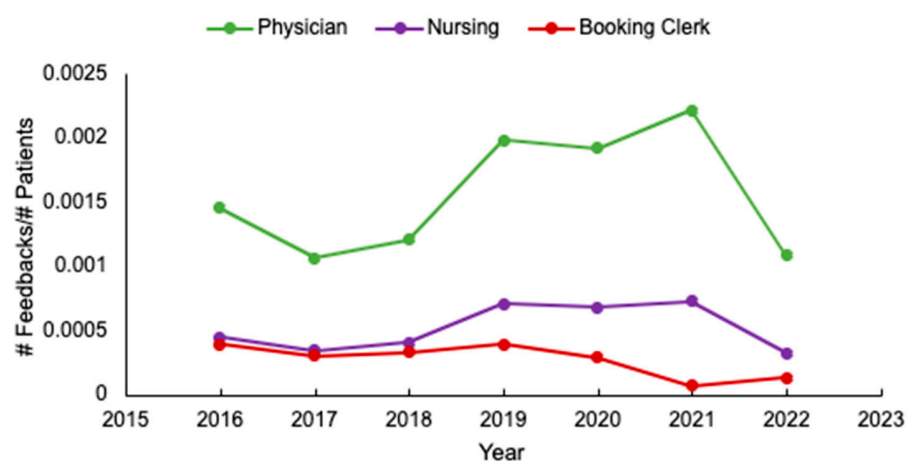

**Figure S3 Proportion of feedback per type of staff adjusted for patients seen by year**
